# Supplementary material
Source: HighWire-hosted journal article supplement (https://cancerimmunolres.aacrjournals.org/content/suppl/2014/08/19/2326-6066.CIR-14-0091)

# Supplementary Figure S1.

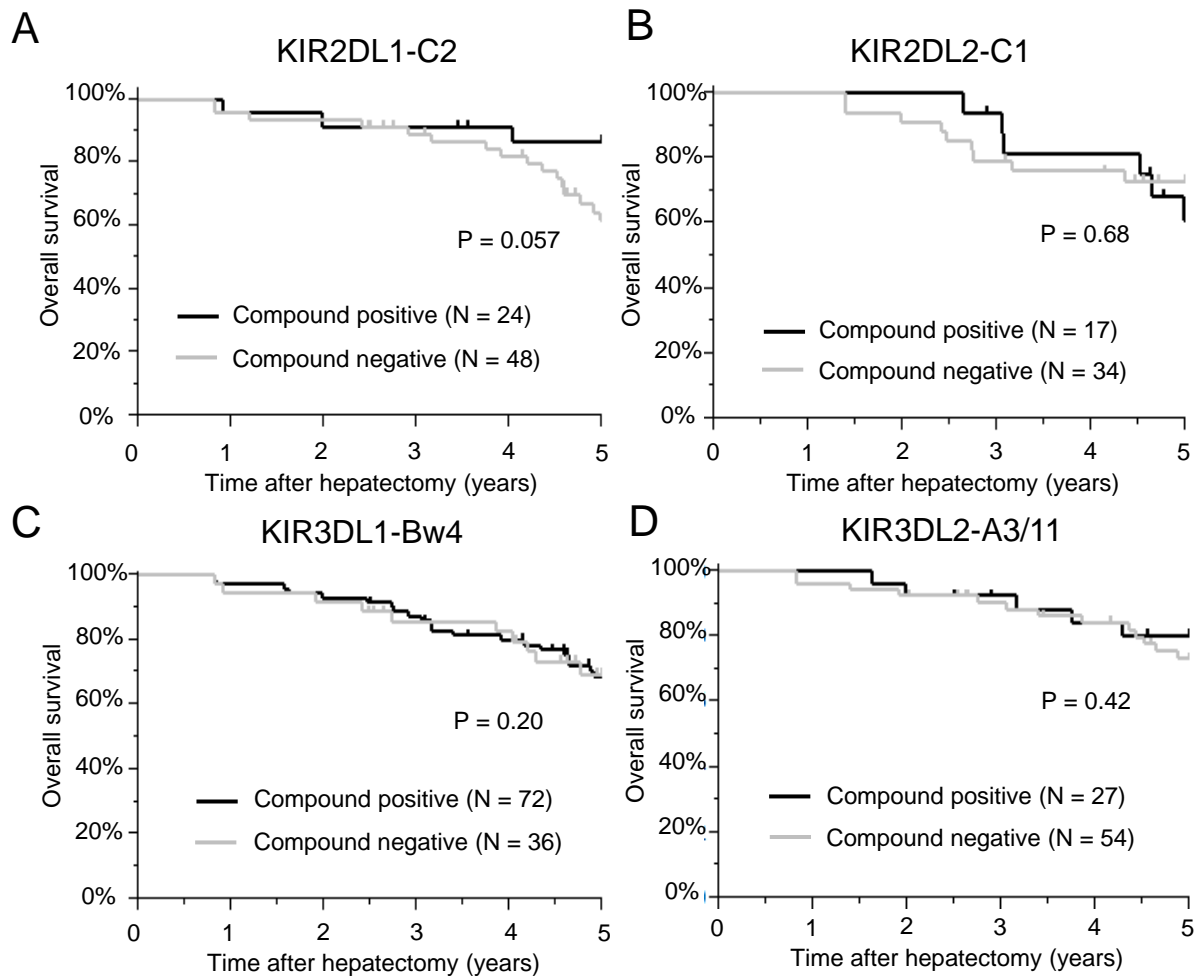

Supplement: 130770_1_supp_0_njcjtx.pdf [file 130770_1_supp_0_njcjtx.pdf]
